# Supplementary material for: Oxygen-deficient 3D-ordered multistage porous interfacial catalysts with enhanced water oxidation performance
Source: Royal Society of Chemistry journal article supplement (doi:10.1039/d0ta08460c), 2020-01-01
Supplement: d0ta08460c1.pdf [file d0ta08460c1.pdf]

## Supporting Information

**Oxygen-deficient 3D-ordered multistage porous interfacial catalysts with enhanced water oxidation performance**

*Xuemin Wang, Ming Liu, Haochen Yu, Hang Zhang, Sihao Yan, Cui Zhang and Shuangxi Liu*

## 1. Related calculation formulas and equations

### 1.1 Electrocatalytic OER

Overpotential ( $\eta$ ) was calculated by the following equation:

$$\eta \text{ (V)} = E_{\text{RHE}} - 1.23 \text{ V} \quad (1)$$

Tafel plots are showed with the linear portions at overpotential fitted to the Tafel equation:

$$\eta = b \log j + a \quad (2)$$

Where  $\eta$  is overpotential,  $j$  is the current density,  $b$  is the Tafel slope, and  $a$  is the exchange current density.

1.2 The ECSA and normalized current density are calculated as follows equation:

$$ECSA = \frac{C_{dl - samples}}{C_{dl - carbon\ paper}} \quad (3)$$

$$j_{ECSA - Normalized} = \frac{j}{ECSA} \quad (4)$$

Where  $C_{dl}$  is double layer capacitance, which was calculated by CV test under different sweep scan rates, and  $j$  is current density.

1.3 The values of mass activity ( $A \text{ g}^{-1}$ ) were calculated from the catalyst loading  $m$  ( $1 \text{ mg cm}^{-2}$ ) and the measured current density  $j$  ( $\text{mA cm}^{-2}$ ) at  $\eta = 0.31 \text{ V}$ .

$$\text{Mass activity} = j / m \quad (5)$$

1.4 The turnover frequency (TOF) was calculated according to the following formula:

$$\text{TOF} = j \times A / (4 \times F \times m) \quad (6)$$

where  $j$  ( $\text{mA cm}^{-2}$ ) is the current density at overpotential 310 mV,  $A$  is the surface area of the working electrode ( $1 \text{ cm}^2$ ),  $F$  is the Faraday's constant ( $96485 \text{ C mol}^{-1}$ ), the

number 4 means that each molecule of O<sub>2</sub> has four electrons, and  $m$  is the number of moles of the catalysts on the electrodes (calculated from catalyst loading mass and the molecular weight of coating catalysts). All Co were assumed to be catalytically active whether they can get into the electrolyte or not. Therefore, the calculated TOF value represents the lower limit.

## **2. Instruments for characterization**

The detailed microstructures were investigated with scanning electron microscopy (SEM; JEOL, JSM-7800F) and transmission electron microscopy (TEM, JEM-2800). Crystallographic information was collected by X-ray powder diffractometer (XRD; Rigaku MiniFlex600). The specific surface area and pore structure of the prepared sample was measured by a N<sub>2</sub> adsorption/desorption apparatus at 77 K (Micromeritics TriStar 3000). The surface composition and valence states were analyzed by X-ray photoelectron spectra (XPS; Thermo Scientific ESCALAB 250Xi).

### 3. Supporting Figures

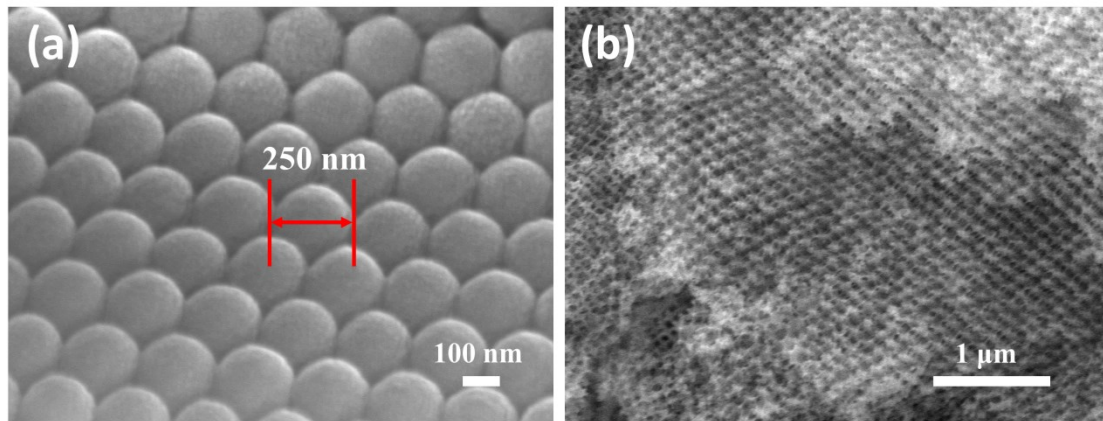

**Figure S1.** The SEM images of (a) 3D-PMMA template and (b) 3DOM-CC-10 electrocatalyst.

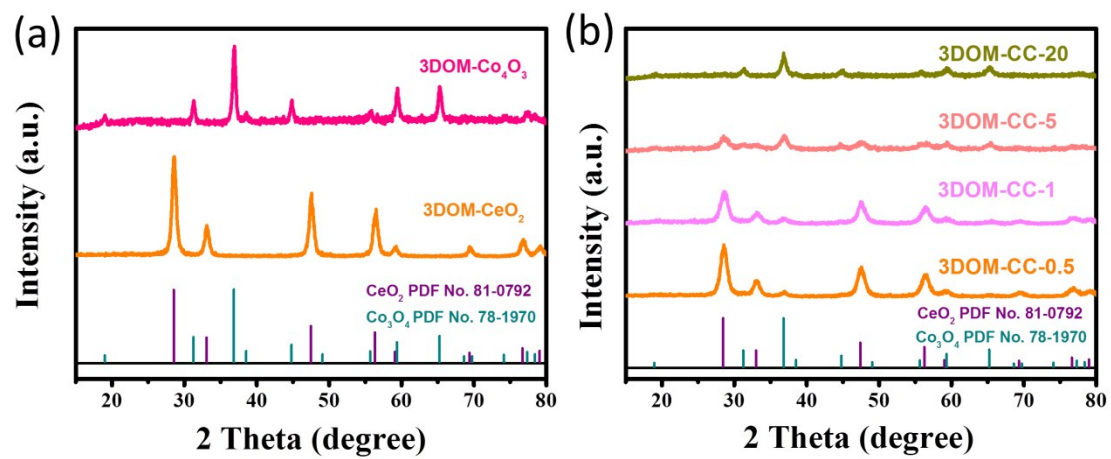

**Figure S2.** The XRD patterns of 3DOM-Co<sub>3</sub>O<sub>4</sub>, 3DOM-CeO<sub>2</sub> and 3DOM-CC-x.

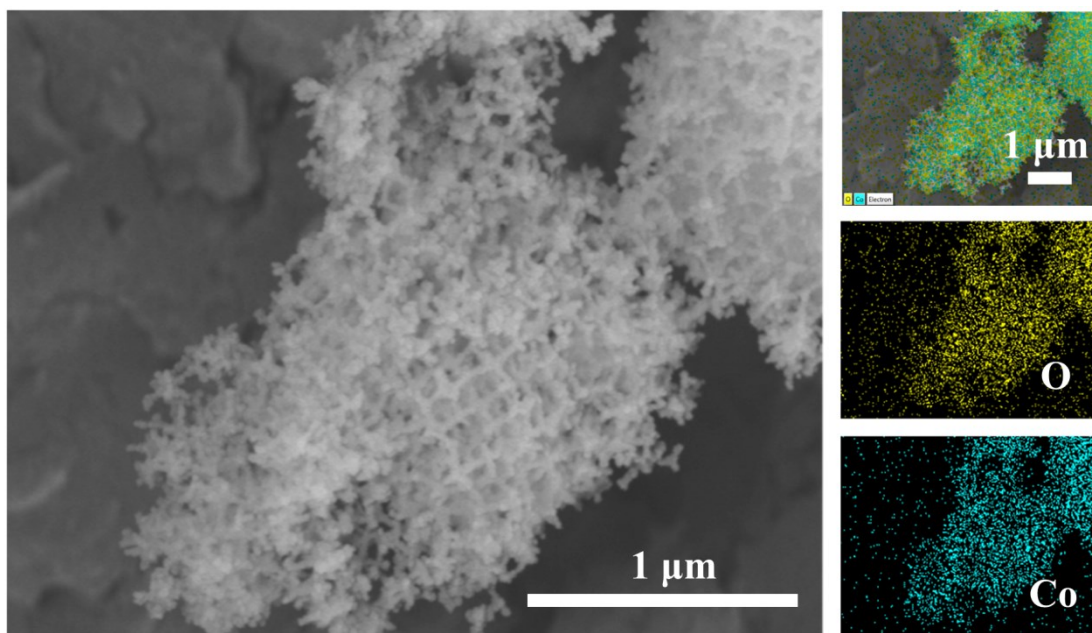

**Figure S3.** The SEM and corresponding mapping images of 3DOM-Co<sub>3</sub>O<sub>4</sub>.

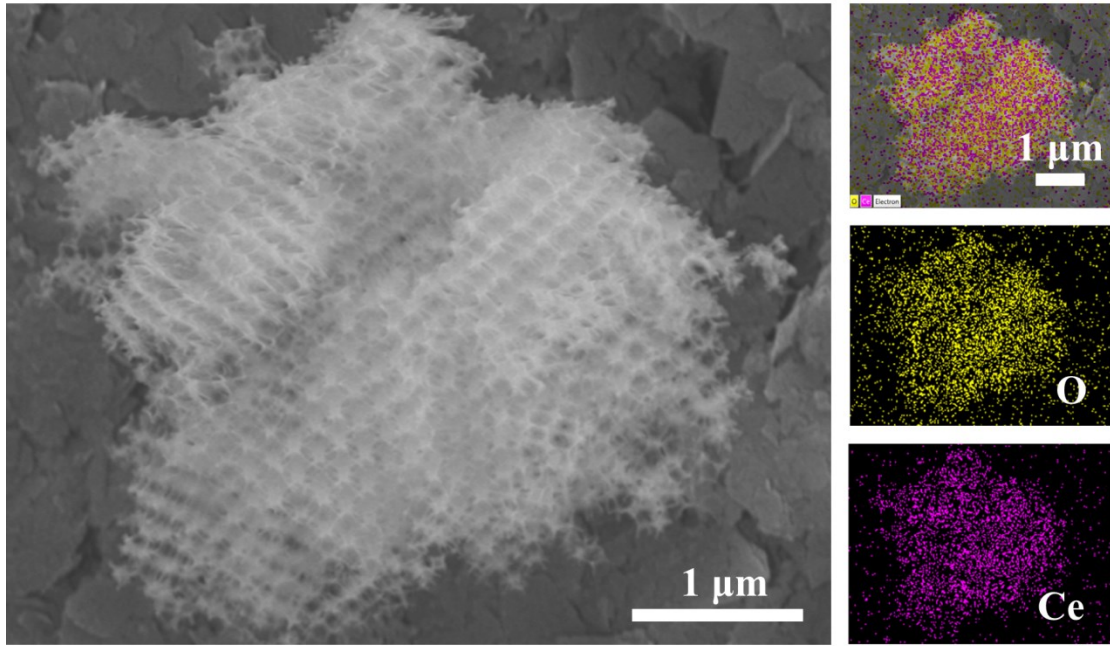

**Figure S4.** The SEM and corresponding mapping images of 3DOM-CeO<sub>2</sub>



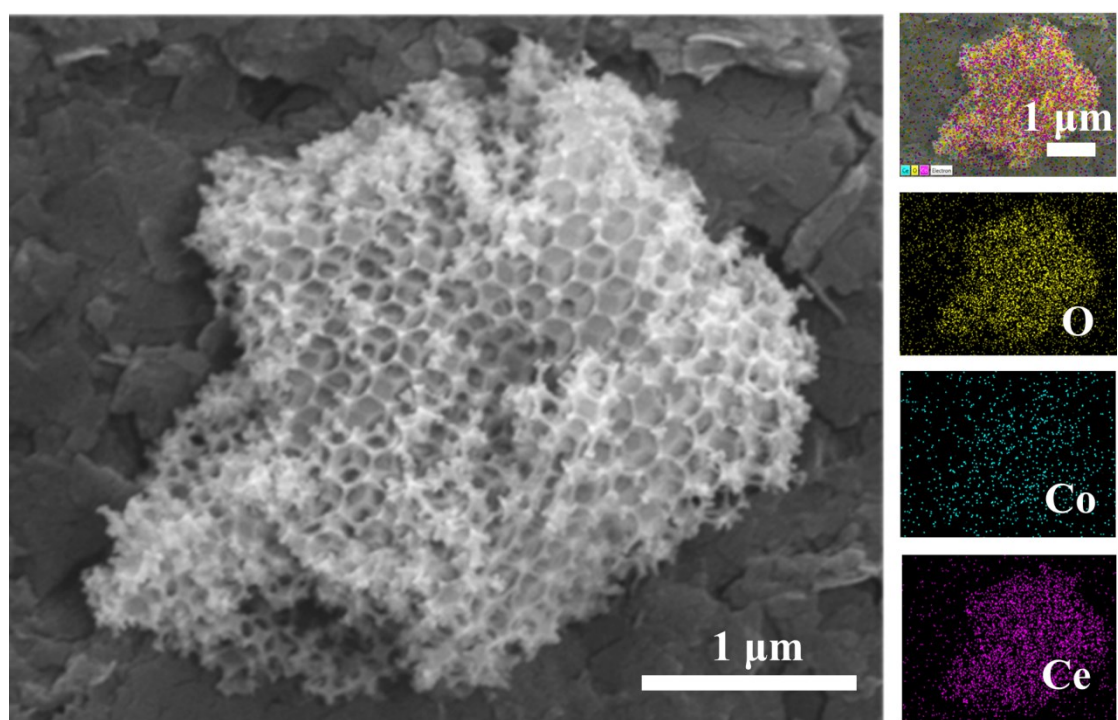

**Figure S5.** The SEM and corresponding mapping images and EDS of 3DOM-CC-20.

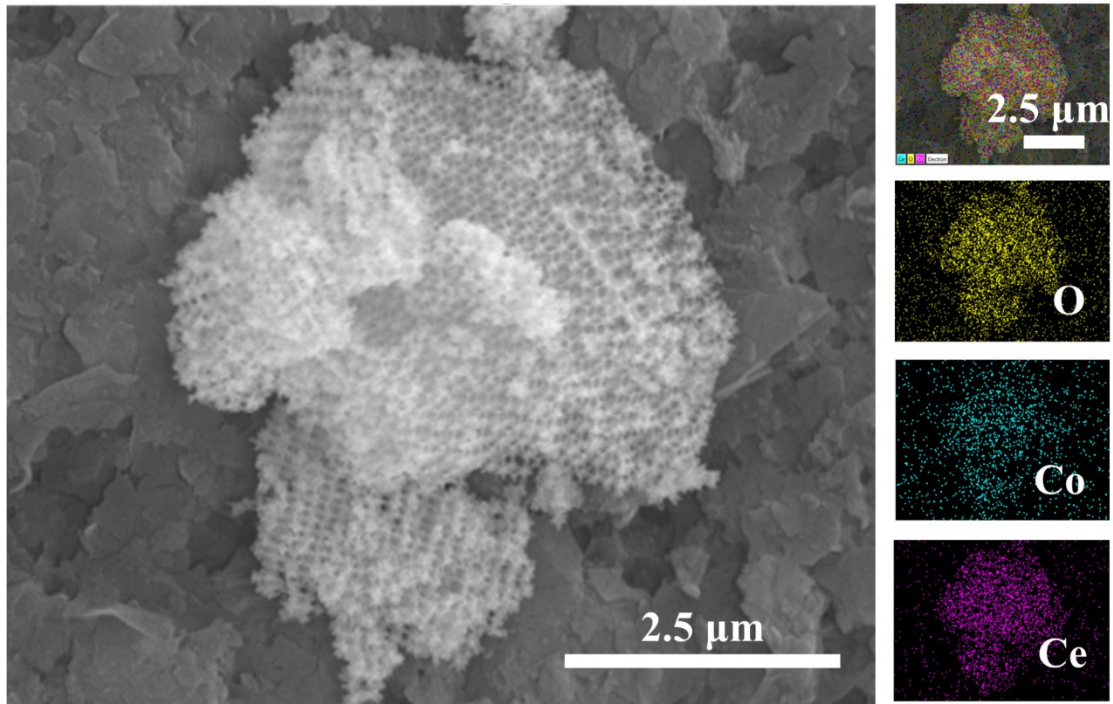

**Figure S6.** The SEM and corresponding mapping images and EDS of 3DOM-CC-5

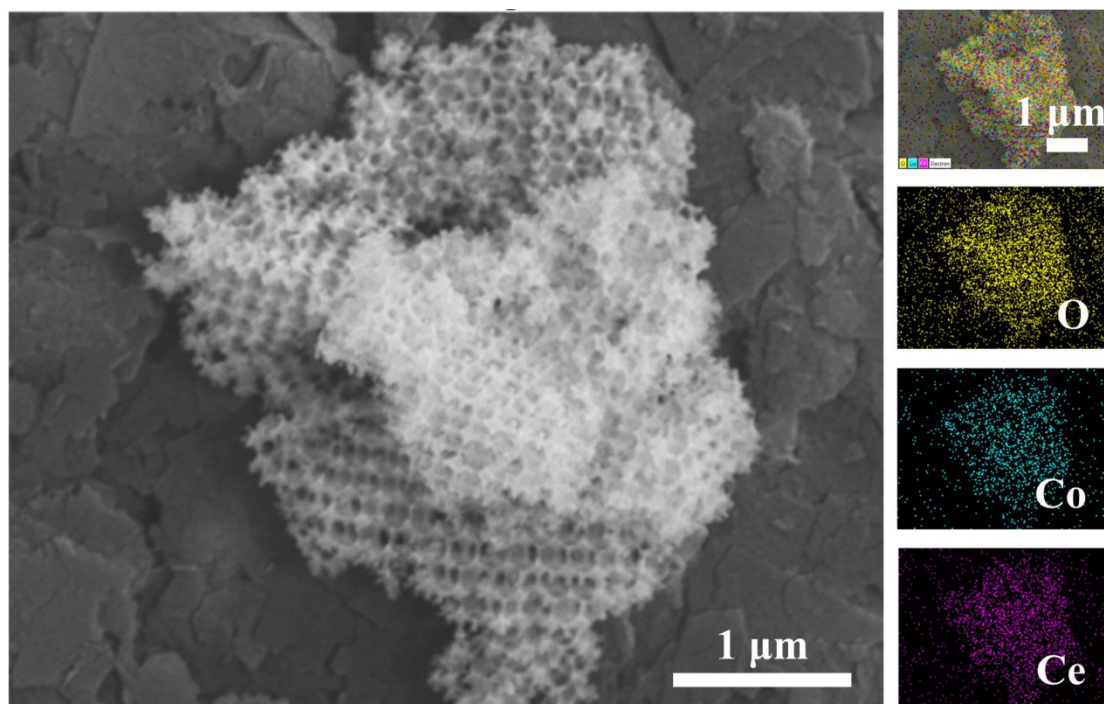

**Figure S7.** The SEM and corresponding mapping images and EDS of 3DOM-CC-1.

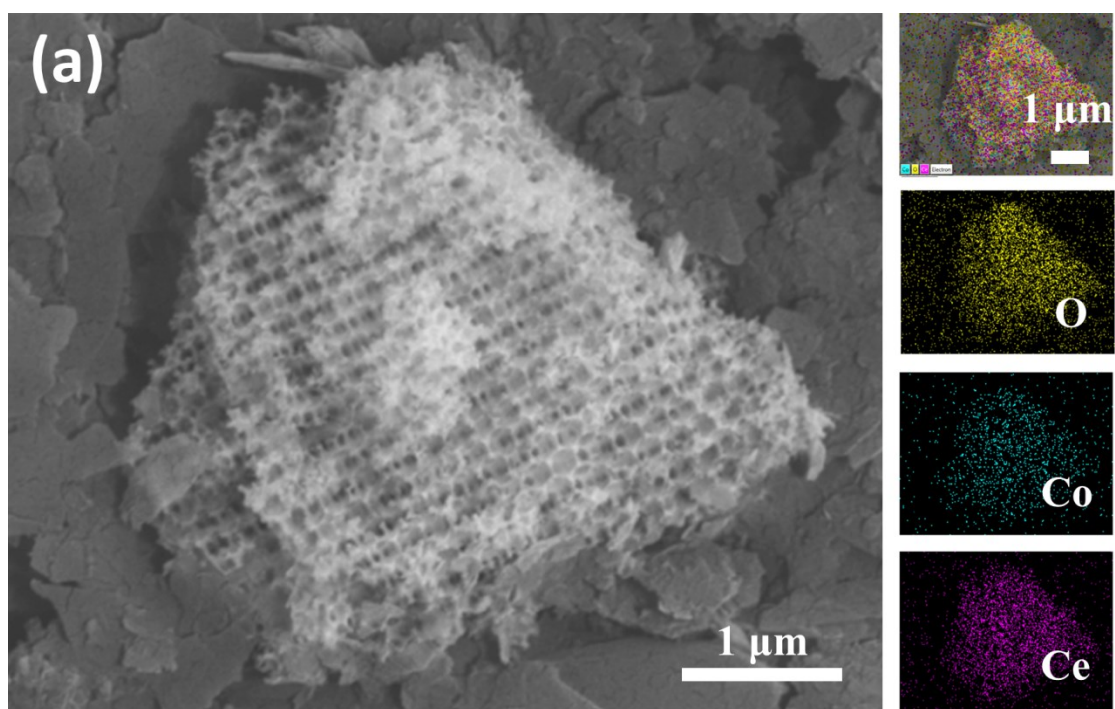

**Figure S8.** The SEM and corresponding mapping and images EDS of 3DOM-CC-0.5.

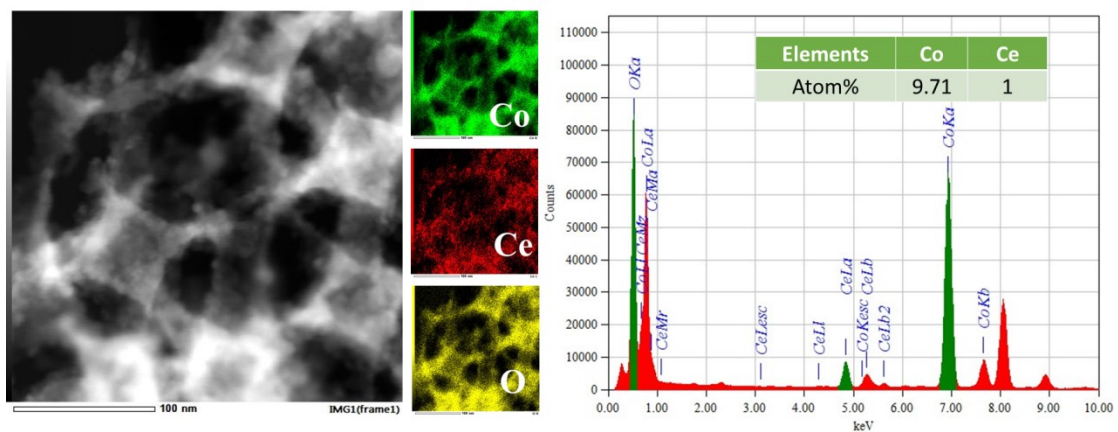

**Figure S9.** The TEM image, element mapping and EDX of (a) 3DOM-CC-10.

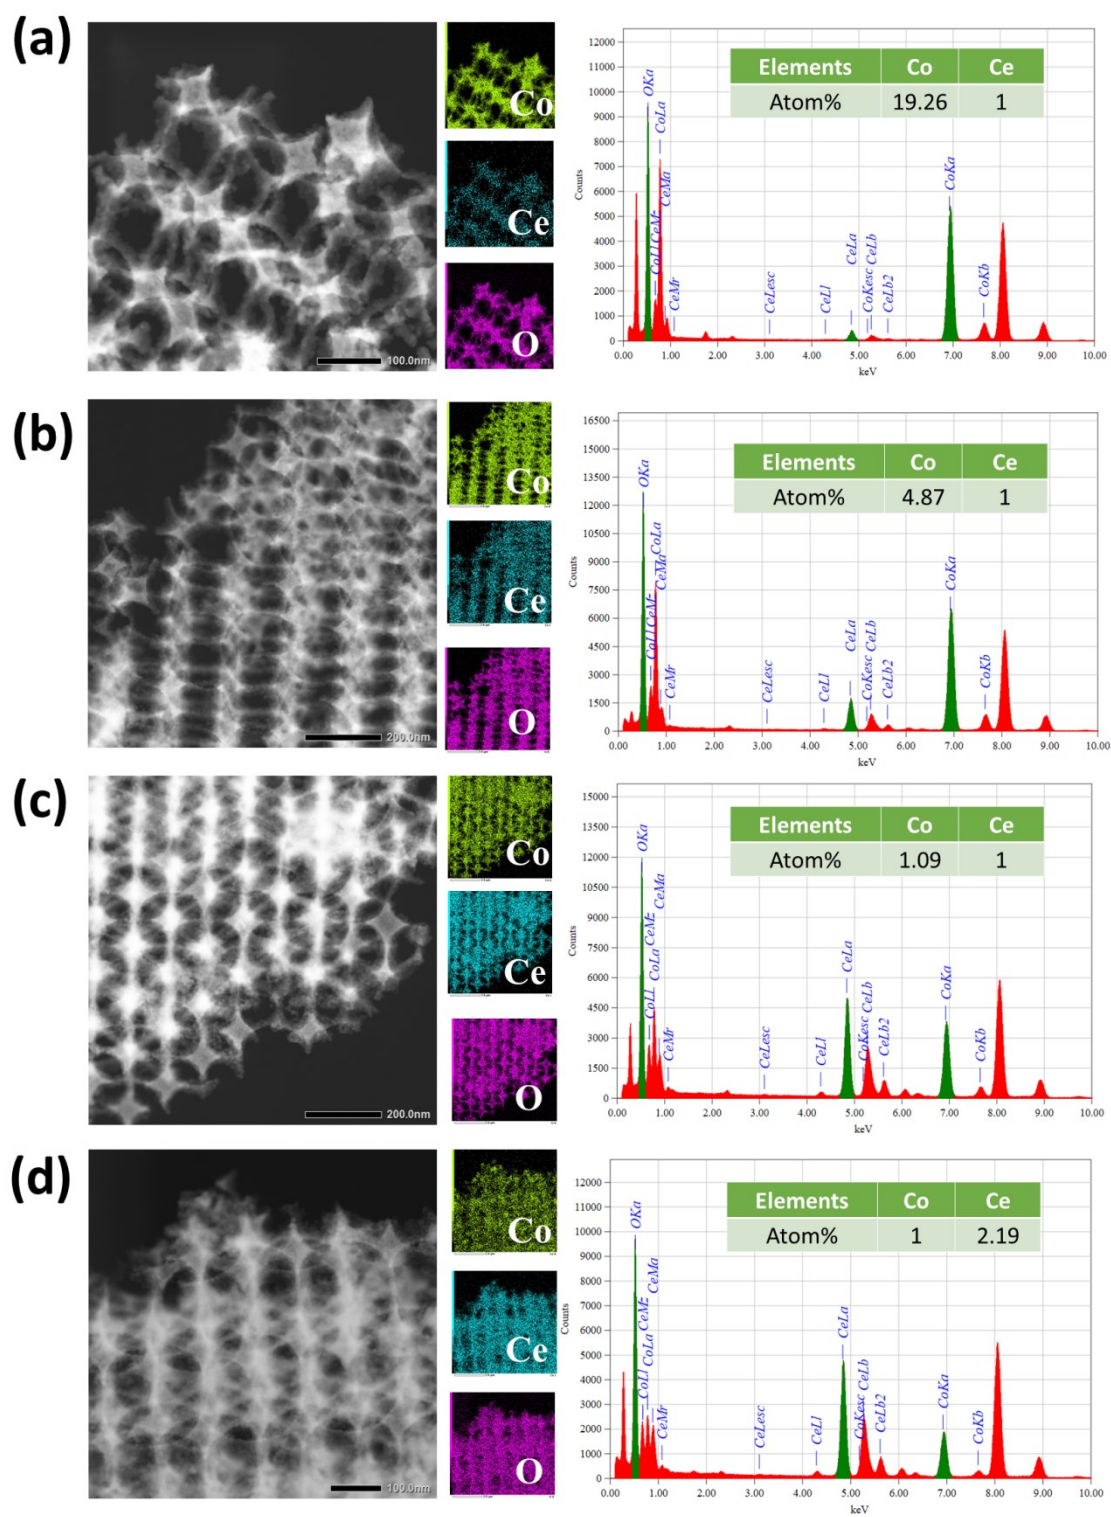

**Figure S10.** The TEM images, element mapping and EDX of (a) 3DOM-CC-20, (b) 3DOM-CC-5, (c) 3DOM-CC-1 and (d) 3DOM-CC-0.5.

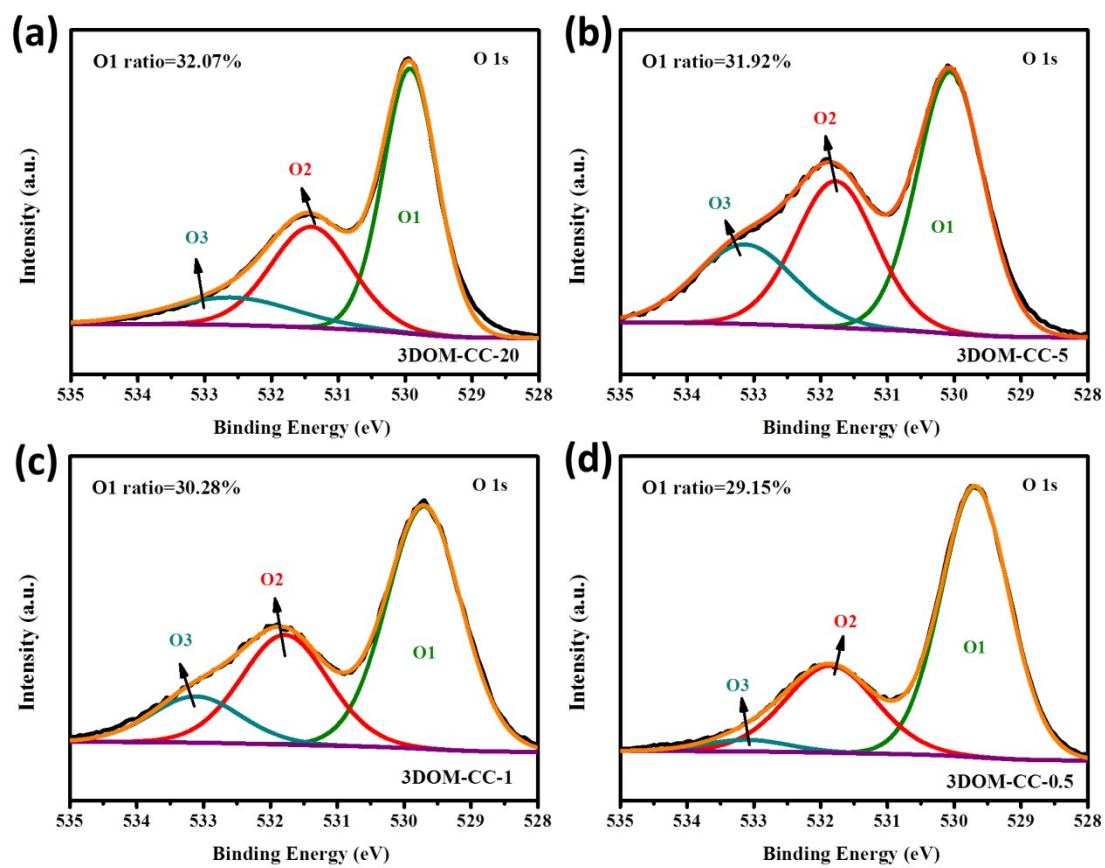

**Figure S11.** XPS O1s spectra of (a) 3DOM-CC-20, (b) 3DOM-CC-5, (c) 3DOM-CC-1 and (d) 3DOM-CC-0.5.

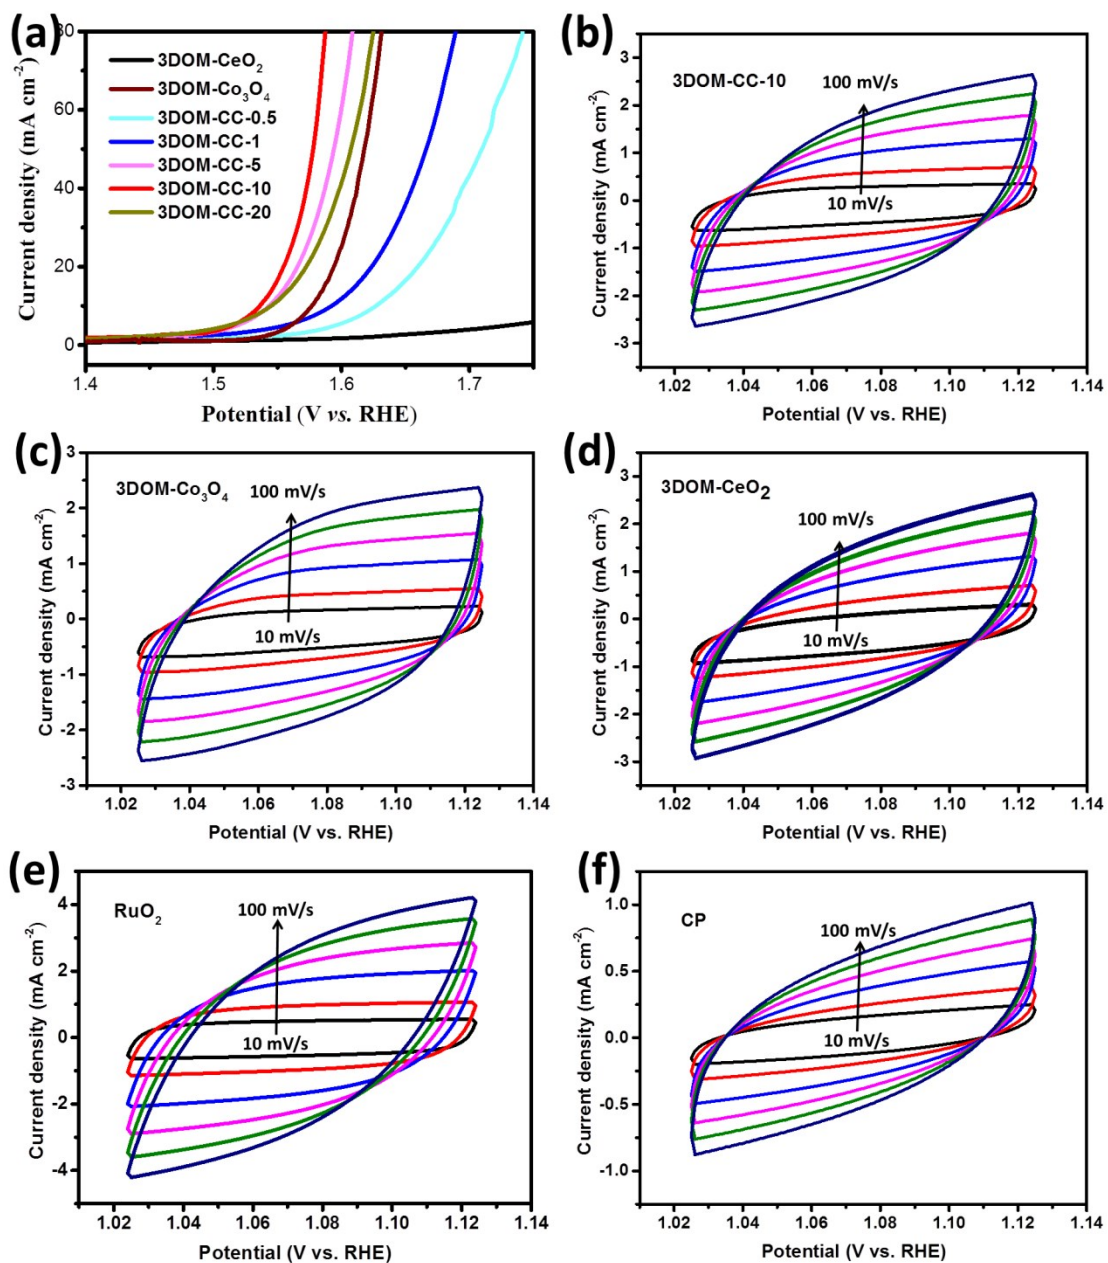

**Figure S12.** (a) LSV curves of 3DOM-Co<sub>3</sub>O<sub>4</sub>, 3DOM-CeO<sub>2</sub> and 3DOM-CC-x. (b) CV curves of 3DOM-CC-10, 3DOM-Co<sub>3</sub>O<sub>4</sub>, 3DOM-CeO<sub>2</sub>, RuO<sub>2</sub> and CP.



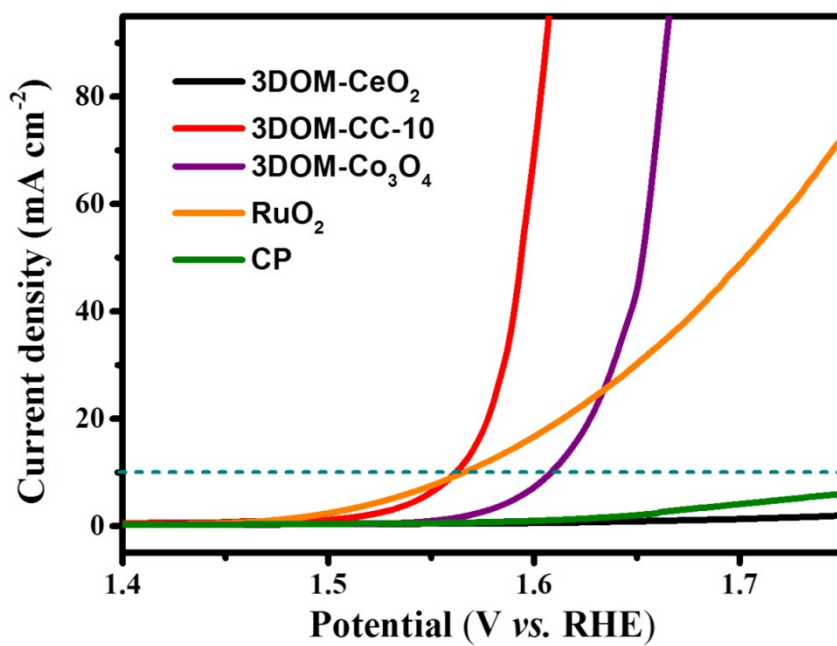

**Figure S13.** LSVs normalized by ECSA of different samples.

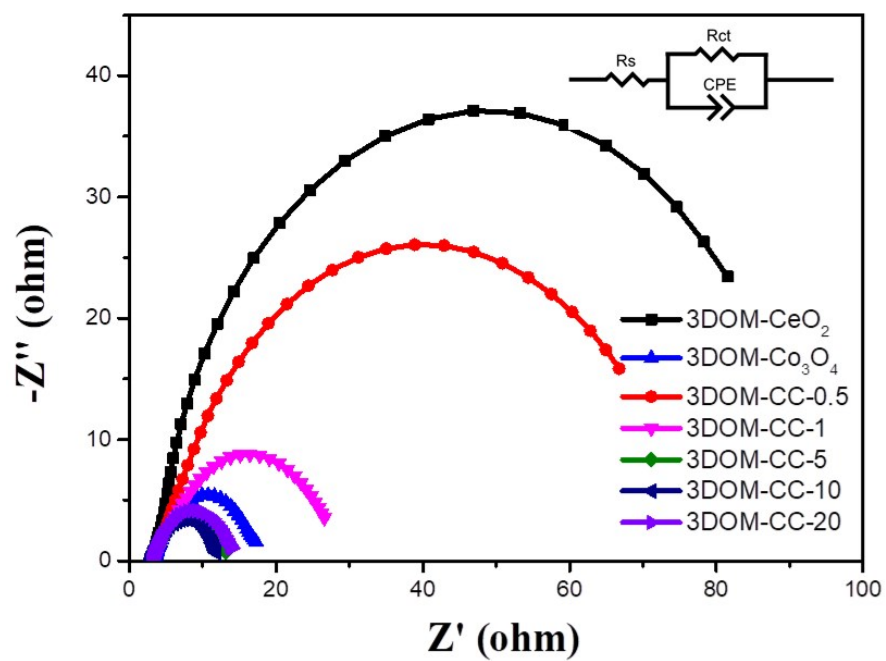

**Figure S14.** EIS Nyquist plots of samples.

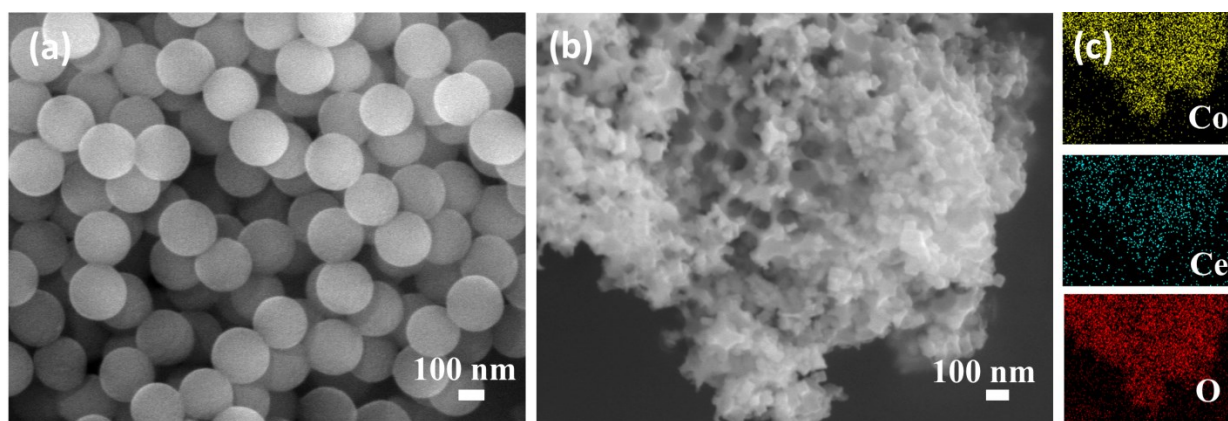

**Figure S15.** SEM images of Disorder-CC-10 (a) before and (b) after heat treatment.

(c) SEM elemental mapping images of Disorder-CC-10.

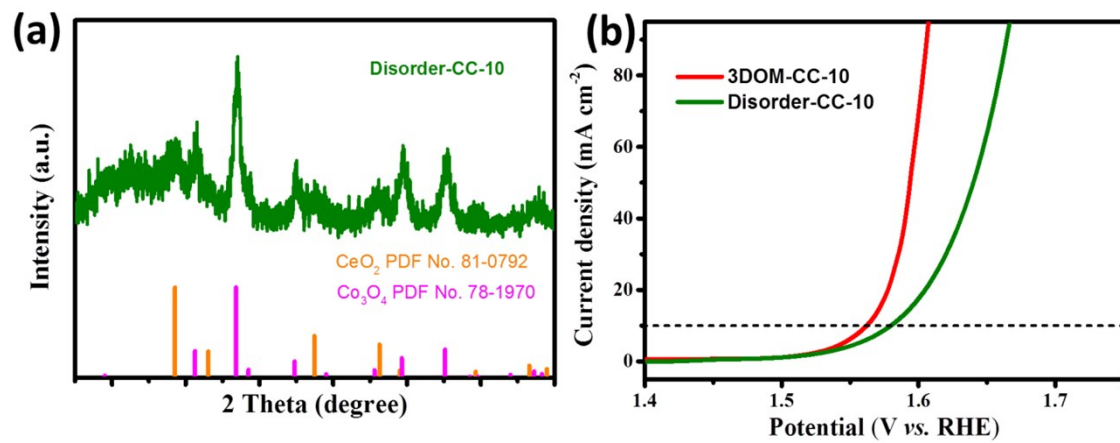

**Figure S16.** (a) XRD pattern and (b) LSV curves of Disorder-CC-10.

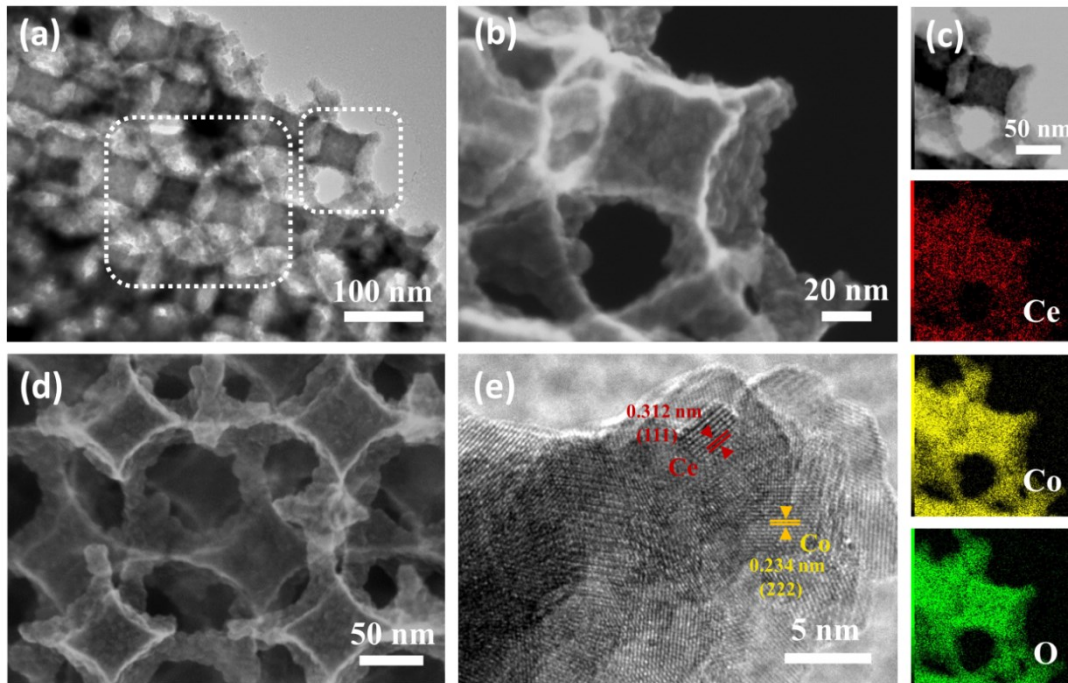

**Figure S17.** Morphology characterization of 3DOM-CC-10 after OER test. (a-b) the TEM images. (c) TEM elemental mapping images. (d) STEM images. (e) HRTEM image.

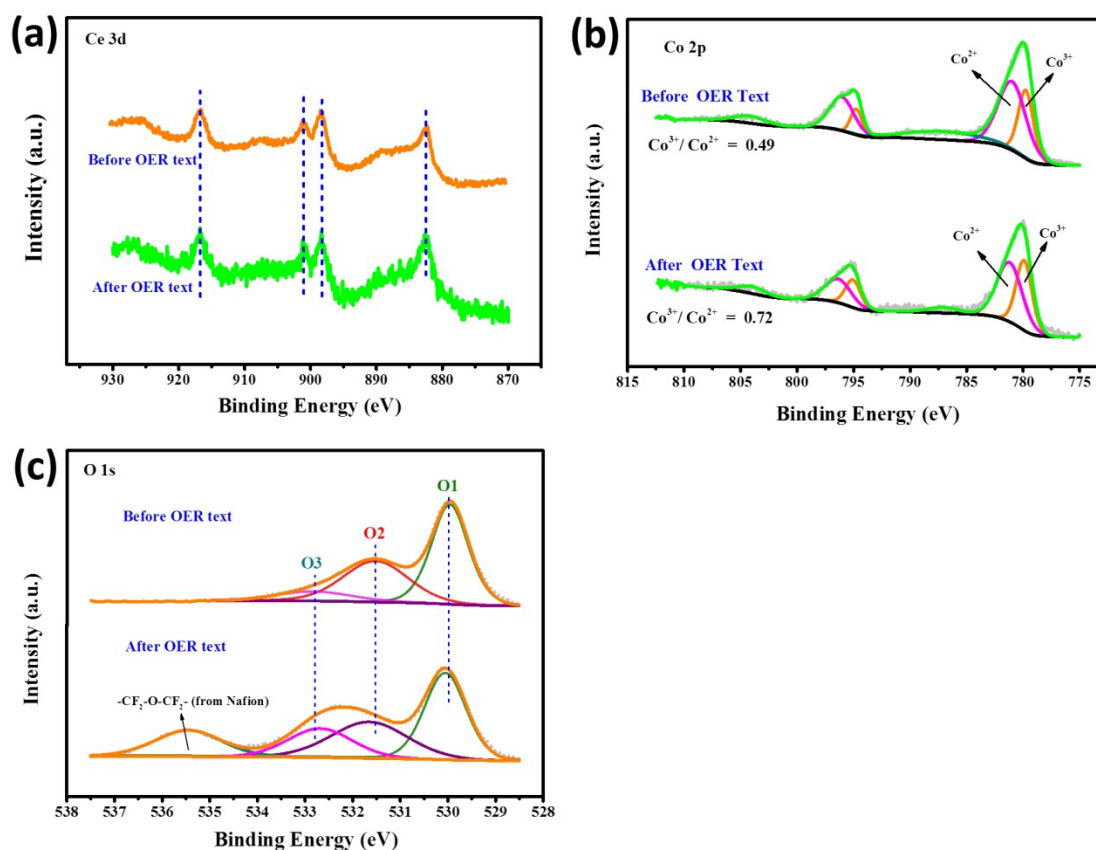

**Figure S18.** XPS (a) Ce 3d, (b) Co 2p and (c) O1s spectra of 3DOM-CC-10 before and after OER text.

**Table S1.** Summary of EDS results of samples with various Co/Ce ratios.

| Sample      | Added value of Co:Ce | Measured value of Ce:Co |
|-------------|----------------------|-------------------------|
| 3DOM-CC-20  | 20:1                 | 19.26:1                 |
| 3DOM-CC-10  | 10:1                 | 9.71:1                  |
| 3DOM-CC-5   | 5:1                  | 4.87:1                  |
| 3DOM-CC-1   | 1:1                  | 1.09:1                  |
| 3DOM-CC-0.5 | 1:2                  | 1:2.19                  |

**Table S2.** Comparison of the performance of 3DOM-CC-10 with similar catalysts reported in the literature

| Catalysts                                                  | Overpotential / mV (10 mA cm <sup>-2</sup> ) | Tafel slop (mV dec <sup>-1</sup> ) | Ref.                                        |
|------------------------------------------------------------|----------------------------------------------|------------------------------------|---------------------------------------------|
| <b>3DOM-CC-10</b>                                          | <b>298</b>                                   | <b>49.5</b>                        | <b>This work</b>                            |
| CeO <sub>x</sub> /CoO <sub>x</sub>                         | 313                                          | 66                                 | ACS Catal., 2018, 8, 4257.                  |
| Ce-MnCo <sub>2</sub> O <sub>4</sub> -3%                    | 390                                          | 125                                | ACS Sustain. Chem. Eng., 2018, 7, 1169.     |
| h-Co <sub>3</sub> O <sub>4</sub> /CeO <sub>2</sub> @N-CNFs | 310                                          | 85                                 | ACS Sustainable Chem. Eng., 2019, 7, 17950. |
| Co-CeO <sub>2</sub> /N-CNR                                 | 410                                          | 90                                 | Appl. Catal. B-Environ., 2018, 237, 1148.   |
| CeO <sub>2</sub> /Co <sub>3</sub> O <sub>4</sub>           | 265                                          | 68.1                               | ACS Catal., 2019, 9, 6484.                  |
| CoO <sub>x</sub> /FeO <sub>x</sub> /CNTs                   | 308                                          | 43                                 | J. Mater. Chem. A, 2020, 8, 15140.          |
| Co <sub>3</sub> O <sub>4</sub> @CoO                        | 430                                          | 89                                 | NPG Asia Mater., 2015, 6, 8106.             |
| Ce-NiO                                                     | 382                                          | 118.7                              | Adv. Funct. Mater., 2018, 28, 1706056       |
| F-CoOOH/NF                                                 | 270                                          | 54                                 | Angew. Chem. Int. Ed., 2018, 57, 15471.     |
| Plasma-Engraved Co <sub>3</sub> O <sub>4</sub>             | 300                                          | 68                                 | Angew. Chem. Int. Ed., 2016, 55, 5277.      |
| Co <sub>3</sub> O <sub>4</sub> NW                          | 320                                          | 72                                 | Angew. Chem. Int. Ed., 2015, 54, 14710.     |
| Ultrathin Co <sub>3</sub> O <sub>4</sub>                   | 307                                          | 76                                 | ACS Catal., 2018, 8, 1913.                  |
| CeO <sub>x</sub> /CoS                                      | 269                                          | 42                                 | J. Mater. Chem. A, 2019, 7, 8284.           |
| Co <sub>3</sub> O <sub>4</sub> /Co-Fe Oxide                | 297                                          | 61                                 | Adv. Mater., 2018, 30, 1801211.             |
| High-Index faceted Co <sub>3</sub> O <sub>4</sub>          | 318                                          | 66                                 | ACS Appl. Mater. Inter., 2018, 10, 7079.    |

|                                                                  |     |    |                                       |
|------------------------------------------------------------------|-----|----|---------------------------------------|
| Fe-Co <sub>3</sub> O <sub>4</sub>                                | 262 | 43 | Adv. Mater., 2020, 32,<br>2002235.    |
| Co <sub>3</sub> O <sub>4</sub> /NiCo <sub>2</sub> O <sub>4</sub> | 340 | 88 | J. Am. Chem. Soc. 2015,<br>137, 5590. |
